# Supplementary material for: Wearable Sensors as a Preoperative Assessment Tool: A Review
Source: MDPI journal article supplement (doi:10.3390/s24020482), 2024-01-12
Supplement: s1 [file s1]

Supplementary Table S2.

| Title                                                                                                                                                           | Authors        | Year | Outcome                                                                  | Sensor & Sensor Modality                       | Pre-processing Techniques                                                                                                                                                                                       | Features Extracted                                                                                                         | Analysis Models                                                                       |
|-----------------------------------------------------------------------------------------------------------------------------------------------------------------|----------------|------|--------------------------------------------------------------------------|------------------------------------------------|-----------------------------------------------------------------------------------------------------------------------------------------------------------------------------------------------------------------|----------------------------------------------------------------------------------------------------------------------------|---------------------------------------------------------------------------------------|
| Predicting Outcomes in Patients Undergoing Pancreatectomy Using Wearable Technology and Machine Learning: Prospective Cohort Study                              | Cos et al.     | 2021 | Complications post pancreatectomy                                        | Fitbit Inspire HR:<br>- PPG<br>- Accelerometer | Detrended Fluctuation Analysis (DFA)<br>2 level imputation method for missing data                                                                                                                              | Daily Step Count<br>Heart rate<br>Sleep time-series                                                                        | RF<br>GBT<br>KNN<br>SVM<br>Logistic Regression                                        |
| Predicting Post-Operative Complications with Wearables: A Case Study with Patients Undergoing Pancreatic Surgery                                                | Zhang et al.   | 2022 | Complications post pancreatectomy                                        | Fitbit Inspire HR:<br>- PPG<br>- Accelerometer | Daily feature extraction threshold > 8hours.<br>2 level imputation method for missing data (Figure 7):<br>Short term imputation (<10mins)<br>Robust singular spectrum analysis to impute missing daily features | Daily Feature extraction: Step<br>Sleep<br>HR time series<br><br>High level feature extraction: Singular spectrum analysis | RF<br>XGBoost<br>KNN<br>SVM<br>Lasso Regressions<br>Ridge Regression                  |
| Objectively measured preoperative physical activity is associated with time to functional recovery after hepato-pancreato-biliary cancer surgery: a pilot study | Mylius et al.  | 2021 | Time to functional recovery post hepato-pancreato-biliary cancer surgery | Actigraph wGT3X- BT+:<br>- Accelerometer       | Extraction Threshold of 6 days+ of data                                                                                                                                                                         | Time spent in MVPA: daily median of total accumulated minutes, daily median minutes accumulate in >10 minute bouts         | Univariate and multivariate robust regression                                         |
| Preoperative physical activity levels and postoperative pulmonary complications post-esophagectomy                                                              | Feeney et al.  | 2011 | Postoperative pulmonary complications post-esophagectomy                 | RT3 Accelerometer:<br>- Accelerometer          | N/A                                                                                                                                                                                                             | Physical activity intensities: inactive, light, moderate and vigorous                                                      | Independent t-test                                                                    |
| Feasibility and patient's experiences of perioperative telemonitoring in major abdominal surgery: an observational pilot study                                  | Haveman et al. | 2022 | Compliance and satisfaction with wearable sensor                         | Everion Biosensor:<br>- PPG<br>- Accelerometer | N/A                                                                                                                                                                                                             | N/A                                                                                                                        | N/A                                                                                   |
| Wearable Technology in the Perioperative Period: Predicting Risk of Postoperative Complications in Patients Undergoing Elective Colorectal Surgery              | Hedrick et al. | 2020 | Postoperative complications                                              | Fitbit charge 2:<br>- PPG<br>- Accelerometer   | N/A                                                                                                                                                                                                             | Daily steps and stratification into two groups (active:>5000 dailys steps, inactive<5000)<br>Daily HR                      | Chi-squared<br>Wilcoxon rank-sum<br>Kruskal-Wallis<br>Multivariable regression models |

Supplementary Table 2.

|                                                                                                                                                    |                  |      |                                                                             |                                               |                                                            |                                                                                                                                          |                                                                                                                               |
|----------------------------------------------------------------------------------------------------------------------------------------------------|------------------|------|-----------------------------------------------------------------------------|-----------------------------------------------|------------------------------------------------------------|------------------------------------------------------------------------------------------------------------------------------------------|-------------------------------------------------------------------------------------------------------------------------------|
| Fitbit Data to Assess Functional Capacity in Patients Before Elective Surgery: Pilot Prospective Observational Study                               | Angelucci et al. | 2023 | 6MWT                                                                        | Fitbit Inspire 2:<br>- PPG<br>- Accelerometer | Missing PPG data imputed with HR data from hospital visit. | HR<br>RHR (24hr average)<br>HR Zones during exercise<br>Daily steps<br>Distance walked<br>Physical activity intensities<br>HROS<br>NET-F | Pearson correlation<br>Wilcoxon Rank Sum Test                                                                                 |
| Wearable Health Technology for Preoperative Risk Assessment in Elderly Patients: The WELCOME Study                                                 | Greco et al.     | 2023 | 6MWT<br>Preoperative scales                                                 | Fitbit Inspire 2:<br>- PPG<br>- Accelerometer | N/A                                                        | Average daily steps<br>VO2max (as processed by the Fitbit device)<br>HR data<br>activity intensity<br>energy expenditure<br>calories.    | Correlation analyses                                                                                                          |
| Wearable technology and the association of perioperative activity level with 30-day readmission among patients undergoing major colorectal surgery | Kane et al.      | 2022 | 30-day readmission                                                          | Fitbit Charge 2:<br>- PPG<br>- Accelerometer  | N/A                                                        | Daily Step count<br>Average HR                                                                                                           | Chi-squared/Fishers exact test (categorical)<br>Wilcoxon Rank Sum/Kruskal Wallis (continuous)                                 |
| Wireless Monitoring Program of Patient-Centered Outcomes and Recovery Before and After Major Abdominal Cancer Surgery                              | Sun et al.       | 2017 | Adherence with WS<br>Satisfaction with monitoring                           | Garmin Vivofit 2:<br>- Accelerometer          | N/A                                                        | Patients Daily Steps                                                                                                                     | Correlation                                                                                                                   |
| Predicting post-discharge cancer surgery complications via telemonitoring of patient-reported outcomes and patient-generated health data           | Rossi et al.     | 2021 | Complications up to 30 days post discharge                                  | Garmin Vivofit:<br>- Accelerometer            | N/A                                                        | Daily steps: maximum, minimum, SD, medium, slope and intercept of linear interpolation, differences compared to baseline                 | Logistic Regression                                                                                                           |
| The association between low pre-operative step count and adverse post-operative outcomes in older patients undergoing colorectal cancer surgery    | Richards et al.  | 2020 | Length of hospital stay<br>Rate of postoperative complications<br>Mortality | Garmin Vivofit 3:<br>- Accelerometer          | N/A                                                        | Patients stratified into two groups from step count:<br><2500:low, >2500:normal                                                          | Univariate variables:<br>Chi-squared and Kruskal-Wallis<br>Negative Binomial Regressions<br>Multivariable Logistic Regression |

Supplementary Table 2.

|                                                                                                                                                                    |                 |      |                                                                                                                             |                                                       |     |                                                                                                                                                                                                                                                                                                                                                                                                                                                                         |                                                                                                                                                   |
|--------------------------------------------------------------------------------------------------------------------------------------------------------------------|-----------------|------|-----------------------------------------------------------------------------------------------------------------------------|-------------------------------------------------------|-----|-------------------------------------------------------------------------------------------------------------------------------------------------------------------------------------------------------------------------------------------------------------------------------------------------------------------------------------------------------------------------------------------------------------------------------------------------------------------------|---------------------------------------------------------------------------------------------------------------------------------------------------|
| How Many Steps Per Day are Necessary to Prevent Postoperative Complications Following Hepato-Pancreato-Biliary Surgeries for Malignancy?                           | Nakajima et al. | 2020 | Rate of major complications with Clavien-Dindo complications<br>Rate of infectious complications<br>Length of hospital stay | Kenx LifecoderGZ:<br>- Accelerometer                  | N/A | Patients stratified into two groups from step count:<br><5000:poor, ≥ 5000:good                                                                                                                                                                                                                                                                                                                                                                                         | Chi-squared and Fisher's exact test and Mann-Whitney <i>U</i> test<br>Spearman's rank correlation coefficient<br>Multivariate logistic regression |
| Preoperative Physical Activity Predicts Surgical Outcomes Following Lung Cancer Resection                                                                          | Billé et al.    | 2021 | Respiratory and cardiac complications<br>30-day readmission rate                                                            | 3D Trisport:<br>- Accelerometer                       | N/A | Patients split into 4 groups based on daily step count based on median and 25% quartiles (not pre-defined quarters).                                                                                                                                                                                                                                                                                                                                                    | Chi-squared or 2-tailed T-tests                                                                                                                   |
| Modeling Biobehavioral Rhythms with Passive Sensing in the Wild: A Case Study to Predict Readmission Risk after Pancreatic Surgery                                 | Doryab et al.   | 2019 | Re-admission within 90-days of discharge.                                                                                   | Fitbit Charge 2:<br>- PPG<br>- Accelerometer          |     | From step count:<br>Number, length and number of steps in active bouts<br>Number and length of sedentary bouts<br>From HR:<br>The minimum, maximum and mean of positive, negative and absolute change in HR<br><br>Detection of rhythmicity by building individual's cosinors using data from each patient before build population level cosinors from readmitted vs non-readmitted patients. Visual features were also extracted from autocorrelation and periodograms | RF<br>Logistic Regression<br>SVM<br>Bayesian Network<br>Boosted Logistic Regression.                                                              |
| Value of the average basal daily walked distance measured using a pedometer to predict maximum oxygen consumption per minute in patients undergoing lung resection | Novoa et al.    | 2010 | VO <sub>2Max</sub>                                                                                                          | OMROM walking style pedometer PRO:<br>- Accelerometer | N/A | Daily steps<br>Daily aerobic steps (aerobic steps are calculated after 10 mins of walking at >60steps per min)<br>Daily time spent in aerobic activity (minutes)<br>Daily distance measured (km)                                                                                                                                                                                                                                                                        | Linear Regression Models<br>Plotting of correlation index between models using Bland and Altman method.                                           |

Supplementary Table 2.

|                                                                                                               |                      |      |                                                         |                                                                                                                  |                                                                                                                                                                                                                                                                                                                                                                               |                                                                 |                                                                                                                                                                                                                                                                                                                                                                                    |
|---------------------------------------------------------------------------------------------------------------|----------------------|------|---------------------------------------------------------|------------------------------------------------------------------------------------------------------------------|-------------------------------------------------------------------------------------------------------------------------------------------------------------------------------------------------------------------------------------------------------------------------------------------------------------------------------------------------------------------------------|-----------------------------------------------------------------|------------------------------------------------------------------------------------------------------------------------------------------------------------------------------------------------------------------------------------------------------------------------------------------------------------------------------------------------------------------------------------|
| Prediction of Physiological Response over Varying Forecast Lengths with a Wearable Health Monitoring Platform | Mohammadzadeh et al. | 2018 | Breathing rate                                          | Bioharness Zephyr:<br>- ECG<br>- Accelerometer<br>Empatica E4:<br>- PPG<br>- Accelerometer                       | N/A                                                                                                                                                                                                                                                                                                                                                                           | Respiratory rate<br>HR<br>HRV                                   | SVM                                                                                                                                                                                                                                                                                                                                                                                |
| Learning Individualized Cardiovascular Responses from Large-scale Wearable Sensors Data                       | Hallgrimson et al.   | 2018 | Cardiovascular response<br>Age<br>BMI*                  | Achievement reward platform (Fitbit or Apple watch):<br>- Accelerometer<br>- PPG                                 | Minute level from step count and heart rate was scaled to measurements between (0,1).<br>Missing data was imputed as mean HR of activity at waking hours.                                                                                                                                                                                                                     | HR<br>Step count<br>Two sleep stages: Asleep or restless asleep | HR autoencoder that is trained on physical activity and sleep stages. The signature encoder learns the participants 'signature' from the HR responses to activity and the decoder employs the learned signature predict HR from PA.<br><br>XGBoost models were used to compare performance against the encoder.                                                                    |
| Self-supervised transfer learning of physiological representations from free-living wearable data             | Spathis et al.       | 2021 | HR Response<br>VO <sub>2</sub> Max<br>BMI<br>Resting HR | Actiheart Chest ECG wearable monitor (2-lead)<br>- ECG<br>Wrist device triaxial accelerometer<br>- Accelerometer | Extraction threshold of >72 hours for inclusion. Magnitude of acceleration from accelerometer data was calculated through Euclidean Norm Minus One and high passed filtered vector magnitude. Both accelerometer and HR data was filtered to a time resolution of one sample per 15 seconds. Temporal features were encoded into timestamps using cyclical temporal features. | HR<br>Acceleration                                              | Proposal of a multimodal self-supervised model for feature extraction from wearable data. The 'Step2Heart' model receives high-dimensional activity inputs to predict HR response. It stacks CNN and RNN layers where the CNN learns spacial features and the RNN learns temporal features of the data. This is compared against several models: Convolutional autoencoder XGBoost |

Supplementary Table 2.

|                                                                                                                                             |                 |      |                                                                                                                                                               |                                                                                                                  |                                                                                                                                                                                                                                                                                 |                                                                                                                                     |                                                                                                                                                                                                             |
|---------------------------------------------------------------------------------------------------------------------------------------------|-----------------|------|---------------------------------------------------------------------------------------------------------------------------------------------------------------|------------------------------------------------------------------------------------------------------------------|---------------------------------------------------------------------------------------------------------------------------------------------------------------------------------------------------------------------------------------------------------------------------------|-------------------------------------------------------------------------------------------------------------------------------------|-------------------------------------------------------------------------------------------------------------------------------------------------------------------------------------------------------------|
| Wearable sensors enable personalized predictions of clinical laboratory measurements                                                        | Dunn et al.     | 2021 | Clinical laboratory measurements including:<br>Hematocrit<br>Hemoglobin<br>Red blood cell counts<br>Absolute monocyte counts<br>HbA1c (average blood glucose) | Intel Basis Smartwatch:<br>- PPG<br>- Accelerometer<br>- Skin Temperature<br>EDA                                 | Implementation of same method for pre-processing clinical records: removal of outliers defined as values >3 S.D. from the mean for that laboratory.                                                                                                                             | 153 features from the continuous wearable sensor data.                                                                              | RF<br>Two-sided Wilcoxon signed Rank test.                                                                                                                                                                  |
| Turning silver into Gold:Domain adaptation with noise labels for wearable cardio-respiratory fitness prediction                             | Wu et al.       | 2022 | VO <sub>2</sub> Max                                                                                                                                           | Actiheart Chest ECG wearable monitor (2-lead)<br>- ECG<br>Wrist device triaxial accelerometer<br>- Accelerometer | Non-wear periods were removed through pre-processing algorithm that identified periods of non-physical heart rate and no movement. Movement intensities were converted into standard metabolic equivalent units (METs). Signals were down sampled to a frequency of 15 minutes. | HR<br>Acceleration                                                                                                                  | Proposal of UDAMA : Unsupervised Domain Adaptation and Multi-Discriminator Adversarial Training that uses the noisy data that is labelled 'silver standard' to improve the modelling of gold standard data. |
| Cardiorespiratory fitness estimation in free-living using wearable sensors                                                                  | Altini et al.   | 2016 | VO <sub>2</sub> Max                                                                                                                                           | Holst ECG Necklace:<br>- ECG<br>- Accelerometer                                                                  | Accelerometer data was band-passed between 0.1 and 10Hz to isolate dynamic components. HR was extracted from RR intervals and averaged over 15s.                                                                                                                                | From accelerometer:<br>Mean of absolute signal<br>Interquartile range<br>Median, variance<br>Low frequency band signal power.<br>HR | Hierarchical Bayesian models for cardio-respiratory fitness estimation.                                                                                                                                     |
| Cardiorespiratory fitness estimation using wearable sensors: Laboratory and free-living analysis of context-specific submaximal heart rates | Altini et al.   | 2016 | VO <sub>2</sub> Max                                                                                                                                           | Holst ECG Necklace:<br>- ECG<br>- Accelerometer                                                                  | For the detection of activities recognised as walking, the accelerometer signal was segmented to 5s and filtered by two separate filters. HR was averaged over 15s.                                                                                                             | From accelerometer:<br>Mean of absolute signal<br>Interquartile range<br>Median, variance<br>Low frequency band signal power.<br>HR | Multiple Linear Regressions models using LOPO cross validation.                                                                                                                                             |
| Prediction of oxygen uptake dynamics by machine learning                                                                                    | Beltrame et al. |      | VO <sub>2</sub>                                                                                                                                               | Hexoskin smartshirt:<br>- ECG<br>- Accelerometer                                                                 | The HR difference variable was calculated by finding the difference                                                                                                                                                                                                             | HR<br>Difference in HR<br>Total hip acceleration                                                                                    | RF                                                                                                                                                                                                          |

Supplementary Table 2.

|                                                                                                  |                |      |                                                                                      |                                                                                                                  |                                                                                                                                                                                                                                                                                                                                       |                                                                                                                                                                                                                                                            |                                                                                           |
|--------------------------------------------------------------------------------------------------|----------------|------|--------------------------------------------------------------------------------------|------------------------------------------------------------------------------------------------------------------|---------------------------------------------------------------------------------------------------------------------------------------------------------------------------------------------------------------------------------------------------------------------------------------------------------------------------------------|------------------------------------------------------------------------------------------------------------------------------------------------------------------------------------------------------------------------------------------------------------|-------------------------------------------------------------------------------------------|
| analysis of wearable sensors during activities of daily living                                   |                |      |                                                                                      | - Respiration Band                                                                                               | between the current HR value and the previous value. Features were low-pass filtered 0.01Hz.                                                                                                                                                                                                                                          | Minute ventilation<br>Breathing frequency<br>Walking cadence                                                                                                                                                                                               |                                                                                           |
| Longitudinal cardio-respiratory fitness prediction through wearables in free-living environments | Spathis et al. | 2022 | VO <sub>2</sub> Max                                                                  | Actiheart Chest ECG wearable monitor (2-lead)<br>- ECG<br>Wrist device triaxial accelerometer<br>- Accelerometer | Non-wear periods were removed through pre-processing algorithm that identified periods of non-physical heart rate and no movement. Movement intensities were converted into standard metabolic equivalent units (METs). Signals were down sampled to a frequency of 15 minutes. Temporal factors were encoded into sensor timestamps. | Statistical features were extracted from signals and every participant week was represented as a row in the feature vector. Features included:<br>Acceleration<br>HR<br>HRV<br>Acceleration derived Euclidean Norm Minus One<br>Acceleration Derived METs. | Deep Neural Network, a network of 2 densely connected feed-forward layers with 128 units. |
| The association of pre-operative home accelerometry with cardiopulmonary exercise variables      | Cui et al.     | 2017 | VO <sub>2</sub> Max<br>Anaerobic Threshold (AT)                                      | AX3 Axivity:<br>- Accelerometer                                                                                  | Employed a fast Fourier transformation to integrate the frequency between 1Hz and 10Hz of the power spectrum. The extraction threshold was set at above 23hrs per day. Each 10s period was categorised as active, stationary or lying.                                                                                                | Activity score<br>Acceleration (mean, S.D., lateral axis mean, vertical axis mean, frequency).                                                                                                                                                             | Multiple linear regression analysis.                                                      |
| Can wearable technology be used to approximate cardiopulmonary exercise testing metrics?         | Jones et al.   | 2021 | VO <sub>2peak</sub><br>Ventilatory equivalent for CO <sub>2</sub><br>AT<br>Peak work | Garmin Vivosmart HR:<br>- Accelerometer<br>- PPG                                                                 | Features were averaged across the 7-day wear period. Total METs was calculated by summing METs from across the week.                                                                                                                                                                                                                  | HR<br>Average HR, Maximum HR<br>Total steps<br>Floors climbed<br>Number of intense minutes of exercise<br>Total calories<br>Total distance travelled                                                                                                       | Linear Regression<br>Correlation between fitted and observed values.                      |

Supplementary Table S2. This table provides a comprehensive breakdown of the most relevant papers included in this review. The columns present the data extracted from each paper including the Outcome variable, sensor modality, pre-processing methods, features extracted and the model of analysis.

Supplementary Table 2.
