# Supplementary material for: Wearable Sensors as a Preoperative Assessment Tool: A Review
Source: MDPI journal article supplement (doi:10.3390/s24020482), 2024-01-12
Supplement: s1 [file s1]

Supplementary Table S1.

| Title                                                                                                                                                           | Sample size | Average age | Gender split (% male) | Ethnicity                                                              | Health condition                                             |
|-----------------------------------------------------------------------------------------------------------------------------------------------------------------|-------------|-------------|-----------------------|------------------------------------------------------------------------|--------------------------------------------------------------|
| Predicting Outcomes in Patients Undergoing Pancreatectomy Using Wearable Technology and Machine Learning: Prospective Cohort Study                              | 48          | 63.2        | 40%                   | White: 95%<br>Non-white: 5%                                            | Patients undergoing pancreatectomy                           |
| Predicting Post-Operative Complications with Wearables: A Case Study with Patients Undergoing Pancreatic Surgery                                                | 61          | 64.4        | 69%                   | White/Caucasian: 92%<br>Black or African American: 0.5%<br>Unknown: 3% | Patients undergoing pancreatectomy                           |
| Objectively measured preoperative physical activity is associated with time to functional recovery after hepato-pancreato-biliary cancer surgery: a pilot study | 31          | 66          | 58%                   | N/A                                                                    | Hepato-pancreato-biliary cancer                              |
| Preoperative physical activity levels and postoperative pulmonary complications post-esophagectomy                                                              | 37          | 61          | 78%                   | N/A                                                                    | Esophageal cancer                                            |
| Feasibility and patient's experiences of perioperative telemonitoring in major abdominal surgery: an observational pilot study                                  | 42          | 68          | 70%                   | N/A                                                                    | Patients undergoing major abdominal surgery                  |
| Wearable Technology in the Perioperative Period: Predicting Risk of Postoperative Complications in Patients Undergoing Elective Colorectal Surgery              | 99          | 55          | 48.4%                 | White: 89%                                                             | Patients undergoing elective colorectal surgery              |
| Fitbit Data to Assess Functional Capacity in Patients Before Elective Surgery: Pilot Prospective Observational Study                                            | 31          | 76          | 29%                   | N/A                                                                    | Patients under consideration for major non-cardiac surgeries |
| Wearable Health Technology for Preoperative Risk Assessment in                                                                                                  | 31          | 76          | 29%                   | N/A                                                                    | Patients under consideration for major non-cardiac surgeries |

Supplementary Table 1.

|                                                                                                                                                    |    |     |     |                                          |                                                                                                 |
|----------------------------------------------------------------------------------------------------------------------------------------------------|----|-----|-----|------------------------------------------|-------------------------------------------------------------------------------------------------|
| Elderly Patients: The WELCOME Study                                                                                                                |    |     |     |                                          |                                                                                                 |
| Wearable technology and the association of perioperative activity level with 30-day readmission among patients undergoing major colorectal surgery | 94 | 54  | 48% | White: 89%                               | Patients undergoing major elective colorectal surgery                                           |
| Wireless Monitoring Program of Patient-Centered Outcomes and Recovery Before and After Major Abdominal Cancer Surgery                              | 20 | 55  | 25% | White: 65%                               | Patients scheduled to undergo curative resection for hepatobiliary and GI cancers               |
| Predicting post-discharge cancer surgery complications via telemonitoring of patient-reported outcomes and patient-generated health data           | 52 | N/A | N/A | N/A                                      | Patients with Gastrointestinal or Lung cancer                                                   |
| The association between low pre-operative step count and adverse post-operative outcomes in older patients undergoing colorectal cancer surgery    | 85 | 76  | 49% | White: 92%<br>Maori: 3.5%<br>Other: 4.7% | Patients undergoing surgery for major colorectal cancer surgery                                 |
| How Many Steps Per Day are Necessary to Prevent Postoperative Complications Following Hepato-Pancreato-Biliary Surgeries for Malignancy?           | 78 | 71  | 68% | N/A                                      | Patients scheduled to undergo open abdominal surgeries for HPB malignancies                     |
| Preoperative Physical Activity Predicts Surgical Outcomes Following Lung Cancer Resection                                                          | 78 | 70  | 45% | N/A                                      | Patients undergoing anatomical Lung resection                                                   |
| Modeling Biobehavioral Rhythms with Passive Sensing in the Wild: A Case Study to Predict Readmission Risk after Pancreatic Surgery                 | 53 | 65  | 47% | White: 94%                               | Patients undergoing surgery for pancreatic cancer or benign conditions (e.g. pancreatic cysts). |

Supplementary Table 1.

|                                                                                                                                                                    |        |     |      |                                                                    |                                                           |
|--------------------------------------------------------------------------------------------------------------------------------------------------------------------|--------|-----|------|--------------------------------------------------------------------|-----------------------------------------------------------|
| Value of the average basal daily walked distance measured using a pedometer to predict maximum oxygen consumption per minute in patients undergoing lung resection | 38     | 63  | 79%  | N/A                                                                | Patients referred to major lung resection for lung cancer |
| Prediction of Physiological Response over Varying Forecast Lengths with a Wearable Health Monitoring Platform                                                      | N/A    | N/A | N/A  | N/A                                                                | N/A                                                       |
| Learning Individualized Cardiovascular Responses from Large-scale Wearable Sensors Data                                                                            | 80,137 | 31  | 18%  | N/A                                                                | N/A                                                       |
| Self-supervised transfer learning of physiological representations from free-living wearable data                                                                  | 2,100  | N/A | N/A  | N/A                                                                | N/A                                                       |
| Wearable sensors enable personalized predictions of clinical laboratory measurements                                                                               | 54     | 57  | 44%  | European: 74%<br>Asian: 15%<br>African American:7%<br>Hispanic: 4% | N/A                                                       |
| Turning silver into Gold:Domain adaptation with noise labels for wearable cardio-respiratory fitness prediction                                                    | 12,425 | N/A | N/A  | N/A                                                                | N/A                                                       |
| Cardiorespiratory fitness estimation in free-living using wearable sensors                                                                                         | 46     | 25  | 84%  | N/A                                                                | N/A                                                       |
| Cardiorespiratory fitness estimation using wearable sensors: Laboratory andfree-living analysis of context-specific submaximal heart rates                         | 51     | 25  | 88%  | N/A                                                                | N/A                                                       |
| Prediction of oxygen uptake dynamics by machine learning                                                                                                           | 16     | 27  | 100% | N/A                                                                | N/A                                                       |

Supplementary Table 1.

|                                                                                                  |        |     |     |     |                                                                      |
|--------------------------------------------------------------------------------------------------|--------|-----|-----|-----|----------------------------------------------------------------------|
| analysis of wearable sensors during activities of daily living                                   |        |     |     |     |                                                                      |
| Longitudinal cardio-respiratory fitness prediction through wearables in free-living environments | 11,059 | N/A | 48% | N/A | N/A                                                                  |
| The association of pre-operative home accelerometry with cardiopulmonary exercise variables      | 48     | 71  | 88% | N/A | Patients attending the pre-operative cardiopulmonary exercise clinic |
| Can wearable technology be used to approximate cardiopulmonary exercise testing metrics?         | 49     | 65  | 65% | N/A | Patients scheduled for major elective intra-abdominal surgery        |

Supplementary Table S1. This table provides a breakdown of the samples used in each of the key research papers included in this review for analysis. Within each column, the sample size is reported alongside participant demographics including: Average age, gender split, ethnicity and health outcomes.
